# Supplementary material for: Perennial and Annual Cropping Sequences Differentially Influence Soil Functionality in Luvisolic Soils
Source: Research Square preprint supplement (doi:10.21203/rs.3.rs-7593740/v1), 2025-09-25
Supplement: Supplementary file 1 [file 368ecaf70396582ea011494c.docx]

Effect of cropping sequences and N fertilization on soil organic carbon, total N, and plant-available N at 15–30 cm and 30–60 cm soil depths in Dark Gray Luvisolic soil of northern Alberta (2018).

| Cropping sequences | Organic C  (%) | | Total N  (%) | |  | Plant-available N | | | |
| --- | --- | --- | --- | --- | --- | --- | --- | --- | --- |
| NH4+  (ppm) | | NO3-  (ppm) | |
| 15-30 | 30-60 | 15-30 | 30-60 |  | 15-30 | 30-60 | 15-30 | 30-60 |
| ………………………………………….Soil depths (cm)…………………………………… | | | | | | | | | |
| S1 | 1.25 | 0.94 | 0.12 | 0.09 |  | 3.53 | 3.04 | 2.47 | 1.55 |
| S2 | 1.42 | 1.03 | 0.13 | 0.10 |  | 3.57 | 4.07 | 2.52 | 1.78 |
| S3 | 1.20 | 0.94 | 0.12 | 0.08 |  | 4.00 | 3.25 | 2.00 | 0.97 |
| S4 | 1.54 | 1.00 | 0.14 | 0.10 |  | 3.67 | 2.85 | 2.96 | 2.11 |
| S5 | 1.16 | 0.88 | 0.11 | 0.09 |  | 3.69 | 3.39 | 2.38 | 1.33 |
| S6 | 1.39 | 0.96 | 0.13 | 0.09 |  | 4.06 | 3.06 | 2.39 | 1.32 |
| S7 | 1.22 | 1.00 | 0.11 | 0.09 |  | 3.48 | 2.73 | 1.92 | 1.10 |
| S8 | 1.46 | 0.99 | 0.14 | 0.09 |  | 3.70 | 2.92 | 2.71 | 1.36 |
| *p-values* |  |  |  |  |  |  |  |  |  |
| S | 0.156 | 0.527 | 0.188 | 0.339 |  | 0.798 | 0.057 | 0.546 | 0.203 |
| N | 0.736 | 0.629 | 0.817 | 0.850 |  | 0.027 | 0.977 | 0.644 | 0.808 |
| S*N | 0.344 | 0.075 | 0.365 | 0.470 |  | 0.074 | 0.415 | 0.071 | 0.096 |

The cropping sequence treatments included S1 = Conventional annual rotation; S2 = Diversified annual rotation; S3 = Annual to perennial rotation; S4 = Legume to vernalizing grass; S5 = Legume to non-vernalizing grass; S6 = Legume to turf grass; S7 = Turf grass to legume; and S8 = Diversified perennial to annual. Numbers followed by different letters are significantly different at p < 0.05 according to Tukey’s test. S, cropping sequences; N, nitrogen levels, S*N, interaction between S and N.

Pearson correlation coefficient of important soil properties analyzed in the 2018 production year.

|  | (1) | (2) | (3) | (4) | (5) | (6) | (7) | (8) | (9) | (10) | (11) | (12) | (13) | (14) | (15) |
| --- | --- | --- | --- | --- | --- | --- | --- | --- | --- | --- | --- | --- | --- | --- | --- |
| (1) TN |  |  |  |  |  |  |  |  |  |  |  |  |  |  |  |
| (2) OC | 0.94 *(<.0001*) |  |  |  |  |  |  |  |  |  |  |  |  |  |  |
| (3) BD | -0.04 *(0.688)* | -0.01 *(0.92)* |  |  |  |  |  |  |  |  |  |  |  |  |  |
| (4) PSI | 0.02 *(0.837)* | 0.10 *(0.294)* | 0.19 *(0.06)* |  |  |  |  |  |  |  |  |  |  |  |  |
| (5) MWD | -0.33 *(0.06)* | -0.43 *(0.01)* | -0.19 *(0.28)* | -0.38  *(0.03)* |  |  |  |  |  |  |  |  |  |  |  |
| (6) MBC | 0.06 *(0.56)* | 0.02 *(0.87)* | -0.03 *(0.77)* | 0.03 *(0.76)* | 0.13 *(0.47)* |  |  |  |  |  |  |  |  |  |  |
| (7) POXC | -0.01 *(0.92)* | -0.06 *(0.52)* | 0.06 *(0.53)* | -0.29  *(0.003)* | 0.41  *(0.02)* | 0.43  *(<.0001)* |  |  |  |  |  |  |  |  |  |
| (8) Bgluco | 0.02 *(0.82)* | 0.07 *(0.47)* | 0.003 *(0.97)* | -0.07 *(0.45)* | -0.29 *(0.106)* | -0.08 *(0.38)* | -0.03 *(0.72)* |  |  |  |  |  |  |  |  |
| (9) NAG | -0.10 *(0.30)* | -0.04  *(0.70)* | -0.07  *(0.50)* | -0.07 *(0.45)* | -0.32 *(0.07)* | 0.06 *(0.55)* | -0.13 *(0.20)* | 0.46 *(<.0001)* |  |  |  |  |  |  |  |
| (10) Phosph | -0.17 *(0.08)* | -0.16 *(0.10)* | -0.08 *(0.38)* | -0.13 *(0.19)* | 0.12 *(0.53)* | -0.01 *(0.92)* | -0.07 *(0.45)* | 0.39 *(<.0001)* | 0.39 *(<.0001)* |  |  |  |  |  |  |
| (11) NH4+ | 0.26  *(0.007)* | 0.33  *(0.0009)* | -0.09 *(0.38)* | 0.11 (*0.27*) | -0.47 *(0.005)* | 0.17  *(0.09)* | -0.13  *(0.18)* | -0.09 *(0.33)* | 0.07  *(0.48)* | -0.01  *(0.87)* |  |  |  |  |  |
| (12) NO3- | 0.28  *(0.004)* | 0.30  *(0.002)* | -0.03  *(0.73)* | -0.07 *(0.45)* | 0.16 *(0.35)* | 0.07  *(0.46)* | 0.08 *(0.42)* | 0.04  *(0.69)* | 0.01 *(0.93)* | -0.13 *(0.17)* | -0.05  *(0.57)* |  |  |  |  |
| (13) Large | -0.31  *(0.07)* | -0.43  *(0.01)* | -0.23 *(0.19)* | -0.40 *(0.02)* | 0.95  *(<.0001)* | 0.14 *(0.42)* | 0.42  *(0.01)* | -0.24 *(0.18)* | -0.33 *(0.06)* | 0.12  *(0.50)* | -0.48  *(0.004)* | 0.15  *(0.39)* |  |  |  |
| (14) Inter | 0.11  *(0.51)* | 0.22  *(0.22)* | 0.35  *(0.04)* | 0.36  *(0.04)* | -0.41  *(0.01)* | -0.31  *(0.07)* | -0.14  *(0.41)* | 0.19  *(0.29)* | 0.13  *(0.48)* | -0.12  *(0.52)* | 0.09  *(0.60)* | -0.26 *(0.14)* | -0.50  *(0.003)* |  |  |
| (15) Small | 0.23  *(0.20)* | 0.26  *(0.13)* | -0.07 *(0.71)* | 0.09  *(0.58)* | -0.64  *(<.0001)* | 0.13  *(0.46)* | -0.31  *(0.08)* | 0.08  *(0.64)* | 0.24  *(0.18)* | -0.02  *(0.89)* | 0.43  *(0.01)* | 0.07  *(0.68)* | -0.61 *(0.0002)* | -0.37  *(0.03)* |  |

(1) Total Nitrogen; (2) Organic Carbon; (3) Bulk density; (4) Soil Penetration Resistance (5) Mean Weight Diameter; (6) Microbial Biomass Carbon; (7) Permanganate Oxidizable Carbon; (8) β-glucosidase; (9) β-N-acetyl-glucosaminidase; (10) Acid phosphomonoesterase; (11) Ammonium ion; (12) Nitrate ion; (13) Large size aggregates (1-4 mm); (14) Intermediate size aggregates (0.25–1 mm); (15) Small size aggregates (<0.25 mm). p-values are in parentheses.

Pearson correlation coefficient of important soil properties analyzed in the 2023 production year.

|  | (1) | (2) | (3) | (4) | (5) | (6) | (7) | (8) | (9) | (10) | (11) | (12) | (13) | (14) | (15) |
| --- | --- | --- | --- | --- | --- | --- | --- | --- | --- | --- | --- | --- | --- | --- | --- |
| (1) TN |  |  |  |  |  |  |  |  |  |  |  |  |  |  |  |
| (2) OC | 0.91  *(<.0001)* |  |  |  |  |  |  |  |  |  |  |  |  |  |  |
| (3) BD | -0.12  *(0.23)* | -0.11  *(0.25)* |  |  |  |  |  |  |  |  |  |  |  |  |  |
| (4) PSI | 0.02  *(0.85)* | 0.10  *(0.29)* | -0.15  *(0.14)* |  |  |  |  |  |  |  |  |  |  |  |  |
| (5) MWD | -0.12  *(0.24)* | -0.18  *(0.07)* | 0.01  *(0.88)* | -0.10 *(0.31)* |  |  |  |  |  |  |  |  |  |  |  |
| (6) MBC | 0.03  *(0.77)* | 0.02  *(0.86)* | -0.14 *(0.16)* | 0.04 *(0.66)* | 0.16  *(0.11)* |  |  |  |  |  |  |  |  |  |  |
| (7) POXC | 0.40 *(<.0001)* | 0.42  *(<.0001)* | -0.09 *(0.34)* | 0.13 *(0.20)* | 0.08  *(0.41)* | -0.02  *(0.81)* |  |  |  |  |  |  |  |  |  |
| (8) Bgluco | 0.09  *(0.35)* | 0.13  *(0.19)* | -0.007 *(0.94)* | 0.25 *(0.01)* | 0.31  *(0.002)* | 0.37  *(0.0002)* | 0.31  *(0.002)* |  |  |  |  |  |  |  |  |
| (9) NAG | -0.05  *(0.64)* | 0.04  *(0.70)* | 0.09 *(0.38)* | 0.09 *(0.39)* | 0.14  *(0.19)* | 0.28  *(0.008)* | 0.26  *(0.01)* | 0.46  *(<.0001)* |  |  |  |  |  |  |  |
| (10) Phosph | 0.17  *(0.10)* | 0.27 *(0.007)* | -0.005 *(0.96)* | 0.30 *(0.003)* | 0.03  *(0.73)* | 0.02  *(0.86)* | 0.35 *(0.0005)* | 0.58 *(<.0001)* | 0.45  *(<.0001)* |  |  |  |  |  |  |
| (11) NH4+ | -0.08  *(0.45)* | -0.10  *(0.31)* | 0.005 *(0.95)* | -0.07 *(0.46)* | -0.007 *(0.94)* | -0.14  *(0.17)* | -0.09  *(0.33)* | -0.07  *(0.45)* | -0.15  *(0.15)* | -0.18 *(0.07)* |  |  |  |  |  |
| (12) NO3- | -0.06  *(0.57)* | -0.06  *(0.50)* | -0.05 *(0.57)* | -0.08 *(0.41)* | -0.09  *(0.37)* | -0.21  *(0.03)* | 0.07  *(0.46)* | -0.12  *(0.24)* | -0.14  *(0.20)* | -0.26 *(0.01)* | 0.54  *(<.0001)* |  |  |  |  |
| (13) Large | -0.08  *(0.40)* | -0.14  *(0.15)* | 0.02 *(0.82)* | -0.13 *(0.20)* | 0.98 *(<.0001)* | 0.22  *(0.02)* | 0.07  *(0.49)* | 0.33 *(0.001)* | 0.14  *(0.20)* | 0.03 *(0.74)* | 0.002 *(0.97)* | -0.11 *(0.28)* |  |  |  |
| (14) Inter | -0.05  *(0.57)* | -0.03  *(0.74)* | 0.19 *(0.05)* | -0.04 *(0.68)* | -0.58 *(<.0001)* | -0.29 *(0.004)* | -0.08  *(0.43)* | -0.19  *(0.05)* | -0.03  *(0.77)* | -0.01 *(0.87)* | -0.02  *(0.81)* | 0.08 *(0.43)* | -0.64 *(<.0001)* |  |  |
| (15) Small | 0.07  *(0.45)* | 0.12  *(0.21)* | -0.16 *(0.10)* | 0.24 *(0.01)* | -0.80 *(<.0001)* | -0.13  *(0.18)* | -0.09  *(0.34)* | -0.28 *(0.006)* | -0.09  *(0.37)* | -0.01 *(0.87)* | -0.08  *(0.39)* | 0.07 *(0.52)* | -0.85 *(<.0001)* | 0.29  *(0.004)* |  |

(1) Total Nitrogen; (2) Organic Carbon; (3) Bulk density; (4) Soil Penetration Resistance (5) Mean Weight Diameter; (6) Microbial Biomass Carbon; (7) Permanganate Oxidizable Carbon; (8) β-glucosidase; (9) β-N-acetyl-glucosaminidase; (10) Acid phosphomonoesterase; (11) Ammonium ion; (12) Nitrate ion; (13) Large size aggregates (1-4 mm); (14) Intermediate size aggregates (0.25–1 mm); (15) Small size aggregates (<0.25 mm). p-values are in parentheses.
